# Supplementary material
Source: PubMed Central journal article supplement (PMC6118577)
Supplement: jci-128-99597-s370.pdf [file jci-128-99597-s370.pdf]

**$\alpha$ v-integrins and toll-like-receptors activate autophagy components to regulate GC B cell responses.**

Fiona RASO, Sara SAGADIEV, Samuel DU, Emily GAGE, Tanvi ARKATKAR, Genita METZLER, Lynda M. STUART, Mark T. ORR, David RAWLINGS, Shaun JACKSON, Adam LACY-HULBERT and Mridu ACHARYA

**Supplementary Data:**

**Supplementary Figure 1: Impaired LC3 lipidation and p62 degradation in  $\alpha$ v-knockout B cells.**

**Supplementary Figure 2: TLR signaling does not lead to activation of autophagy proteins in non-GC follicular cells.**

**Supplementary Figure 3:  $\alpha$ v does not affect antibody response to VLPs without ssRNA.**

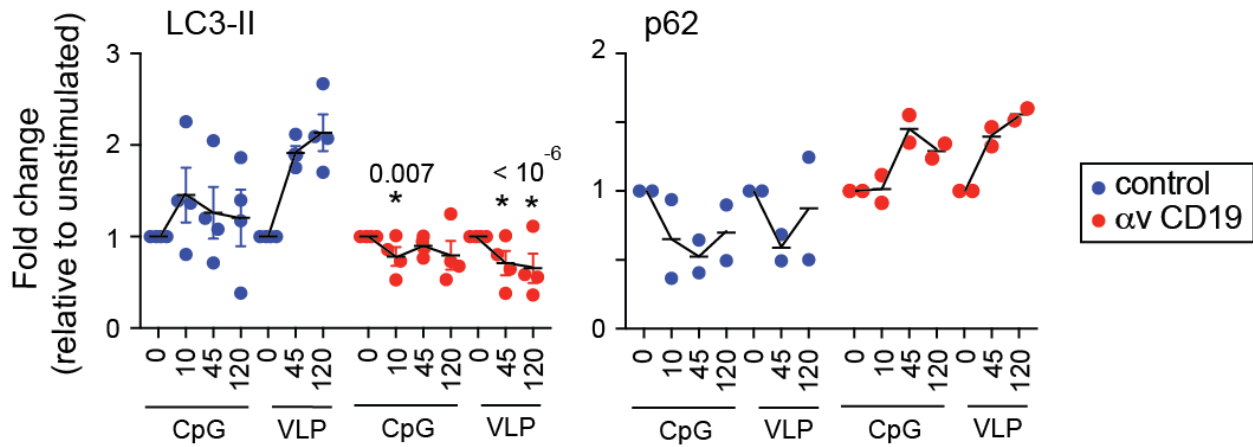

**Supplementary Figure 1: Impaired LC3 lipidation and p62 degradation in  $\alpha$ v-knockout B cells.** Quantification of western blots of LC3-II and p62 of sorted GC B cells from  $\alpha$ v-CD19 and control mice 14 days after immunization with VLP, following CpG DNA or VLP stimulation for the indicated time (mins) (as shown in Figure 4B). LC3-II or p62 levels were first normalized to protein loading (based on levels of  $\beta$ -actin), and then expressed relative to the level in unstimulated cells. Each point represents data from a single blot and are expressed as mean (p62) or mean  $\pm$  sem (LC3-II). *P*-values for comparison of control and  $\alpha$ v-CD19 cells at each time point are shown (Student's t-test corrected for multiple comparisons using Holm-Sidak method).

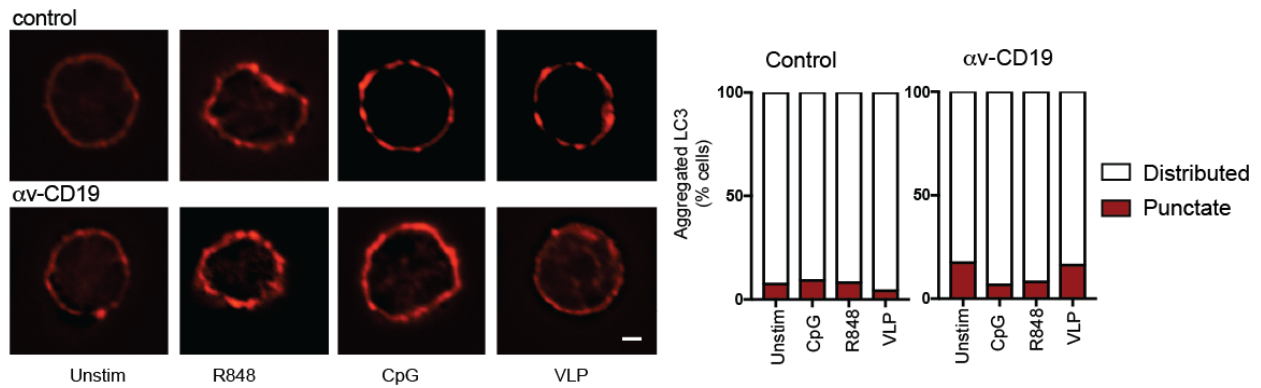

**Supplementary Figure 2: TLR signaling does not lead to activation of autophagy proteins in non-GC follicular cells.** Confocal images of sorted primary GC B cells (as in **Figure 4**), treated with CpG DNA, R848 or VLP for 2 hr and stained with LC3 antibody. Quantification of LC3 reorganization after stimulation with indicated TLR ligands is presented as bar graphs. Data are based on analysis of at least 30 cells/ condition.

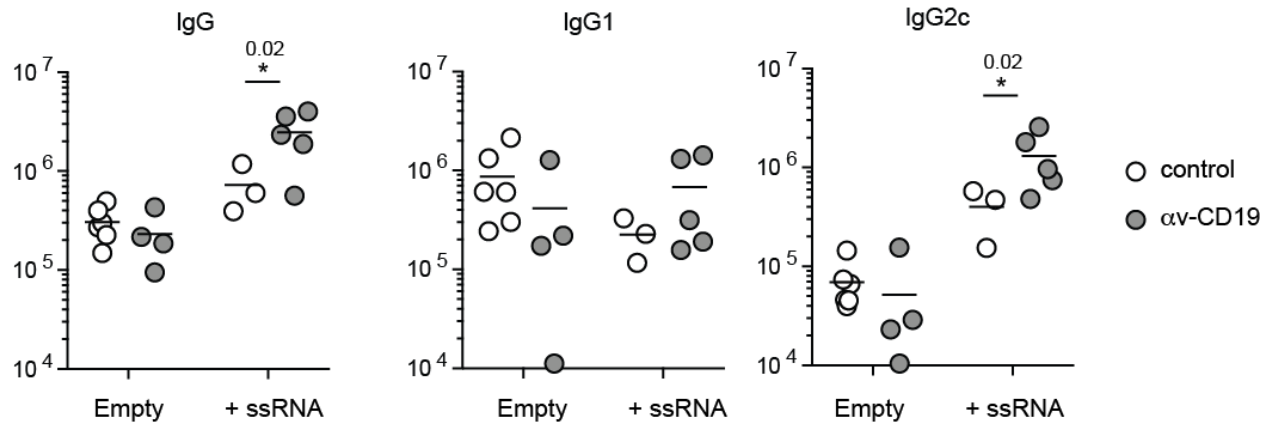

**Supplementary Figure 3:  $\alpha v$  does not affect antibody response to VLPs without ssRNA.**

Serum anti-VLP antibody titers in control and  $\alpha v$ -CD19 mice immunized with 2 $\mu$ g VLPs with (+ssRNA) or without ssRNA (empty VLPs) measured 14 days after immunization. All data points represent individual mice with mean shown. \*, statistically significant difference between control and  $\alpha v$ -CD19 mice, *p*-value shown, Student's t-test.
